# Supplementary material
Source: PubMed Central journal article supplement (PMC3250139)
Supplement: 1116110108_sapp.pdf [file 1116110108_sapp.pdf]

## Supplemental Data

**Supplementary Table 1.** Differentially expressed genes in elderly vs. young HSC. SAM significant genes (FDR < 30%); age-up-regulated genes are in red, and age-down-regulated genes are in green.

| Gene ID      | Gene Name                                                                                                                                                                                                                              | Fold Change |
|--------------|----------------------------------------------------------------------------------------------------------------------------------------------------------------------------------------------------------------------------------------|-------------|
| 242828_at    | FIGN: fidgetin                                                                                                                                                                                                                         | 12.84       |
| 239710_at    | FIGN: fidgetin                                                                                                                                                                                                                         | 9.40        |
| 228863_at    | PCDH17: protocadherin 17                                                                                                                                                                                                               | 4.69        |
| 220518_at    | ABI3BP: ABI gene family, member 3 (NESH) binding protein                                                                                                                                                                               | 4.25        |
| 1560698_a_at | LOC283392: hypothetical protein LOC283392                                                                                                                                                                                              | 4.13        |
| 238964_at    | FIGN: fidgetin                                                                                                                                                                                                                         | 4.05        |
| 234074_at    | ---: CDNA FLJ10946 fis, clone PLACE1000005                                                                                                                                                                                             | 3.97        |
| 220014_at    | PRR16: proline rich 16                                                                                                                                                                                                                 | 3.87        |
| 241470_x_at  | ---: Transcribed locus                                                                                                                                                                                                                 | 3.84        |
| 227289_at    | PCDH17: protocadherin 17                                                                                                                                                                                                               | 3.79        |
| 236193_at    | HIST1H2BC /// HIST1H2BE /// HIST1H2BF /// HIST1H2BG /// HIST1H2BI: histone cluster 1, H2bg /// histone cluster 1, H2bf /// histone cluster 1, H2be /// histone cluster 1, H2bf /// histone cluster 1, H2bi /// histone cluster 1, H2bc | 3.75        |
| 220679_s_at  | CDH7: cadherin 7, type 2                                                                                                                                                                                                               | 3.45        |
| 243882_at    | ---: ---                                                                                                                                                                                                                               | 3.37        |
| 241845_at    | ---: ---                                                                                                                                                                                                                               | 3.33        |
| 1554007_at   | ---: CDNA clone IMAGE:5303689                                                                                                                                                                                                          | 3.31        |
| 1553808_a_at | NKX2-3: NK2 transcription factor related, locus 3 (Drosophila)                                                                                                                                                                         | 3.27        |
| 209369_at    | ANXA3: annexin A3                                                                                                                                                                                                                      | 3.27        |
| 223395_at    | ABI3BP: ABI gene family, member 3 (NESH) binding protein                                                                                                                                                                               | 3.14        |
| 237009_at    | ---: ---                                                                                                                                                                                                                               | 3.11        |
| 233611_at    | ---: CDNA FLJ12106 fis, clone HEMBB1002702                                                                                                                                                                                             | 3.06        |
| 228195_at    | MGC13057: hypothetical protein MGC13057                                                                                                                                                                                                | 2.96        |
| 1554592_a_at | SLC1A6: solute carrier family 1 (high affinity aspartate/glutamate transporter), member 6                                                                                                                                              | 2.96        |
| 228373_at    | C16orf72: chromosome 16 open reading frame 72                                                                                                                                                                                          | 2.94        |
| 219937_at    | TRHDE: thyrotropin-releasing hormone degrading enzyme                                                                                                                                                                                  | 2.93        |
| 230192_at    | TRIM13: tripartite motif-containing 13                                                                                                                                                                                                 | 2.91        |
| 230836_at    | ST8SIA4: ST8 alpha-N-acetyl-neuraminide alpha-2,8-sialyltransferase 4                                                                                                                                                                  | 2.88        |
| 231969_at    | STOX2: storkhead box 2                                                                                                                                                                                                                 | 2.87        |
| 1554593_s_at | SLC1A6: solute carrier family 1 (high affinity aspartate/glutamate transporter), member 6                                                                                                                                              | 2.87        |
| 205656_at    | PCDH17: protocadherin 17                                                                                                                                                                                                               | 2.84        |
| 244414_at    | ---: ---                                                                                                                                                                                                                               | 2.82        |
| 226977_at    | LOC492311: similar to bovine IgA regulatory protein                                                                                                                                                                                    | 2.78        |
| 244674_at    | ---: Transcribed locus                                                                                                                                                                                                                 | 2.77        |
| 1565913_at   | ---: Full length insert cDNA clone YR04D03                                                                                                                                                                                             | 2.75        |
| 228821_at    | ST6GAL2: ST6 beta-galactosamide alpha-2,6-sialyltransferase 2                                                                                                                                                                          | 2.74        |
| 1557756_a_at | C14orf145: chromosome 14 open reading frame 145                                                                                                                                                                                        | 2.72        |
| 236548_at    | GIPC2: GIPC PDZ domain containing family, member 2                                                                                                                                                                                     | 2.72        |
| 1559401_a_at | ---: CDNA clone IMAGE:5267013                                                                                                                                                                                                          | 2.71        |
| 236495_at    | ---: Transcribed locus                                                                                                                                                                                                                 | 2.70        |
| 227874_at    | EMCN: Endomucin                                                                                                                                                                                                                        | 2.68        |
| 202431_s_at  | MYC: v-myc myelocytomatosis viral oncogene homolog (avian)                                                                                                                                                                             | 2.65        |
| 237409_at    | ---: Transcribed locus                                                                                                                                                                                                                 | 2.64        |
| 238937_at    | ZNF420: zinc finger protein 420                                                                                                                                                                                                        | 2.63        |
| 225838_at    | EPC2: enhancer of polycomb homolog 2 (Drosophila)                                                                                                                                                                                      | 2.63        |
| 231979_at    | ---: CDNA FLJ13266 fis, clone OVARC1000960                                                                                                                                                                                             | 2.63        |
| 203739_at    | ZNF217: zinc finger protein 217                                                                                                                                                                                                        | 2.62        |
| 218979_at    | RMI1: RMI1, RecQ mediated genome instability 1, homolog (S. cerevisiae)                                                                                                                                                                | 2.60        |
| 1556931_at   | ---: Full length insert cDNA clone ZD58F06                                                                                                                                                                                             | 2.59        |
| 230703_at    | ---: Transcribed locus                                                                                                                                                                                                                 | 2.57        |
| 1565602_at   | ---: Full length insert cDNA clone YN67C05                                                                                                                                                                                             | 2.56        |
| 204712_at    | WIF1: WNT inhibitory factor 1                                                                                                                                                                                                          | 2.55        |
| 234033_at    | ---: Clone IMAGE:110218 mRNA sequence                                                                                                                                                                                                  | 2.54        |
| 206049_at    | SELP: selectin P (granule membrane protein 140kDa, antigen CD62)                                                                                                                                                                       | 2.50        |
| 216456_at    | ---: MRNA; cDNA DKFZp761L0812 (from clone DKFZp761L0812); partial cds                                                                                                                                                                  | 2.49        |

|              |                                                                                                                                                                                    |      |
|--------------|------------------------------------------------------------------------------------------------------------------------------------------------------------------------------------|------|
| 209189_at    | FOS: v-fos FBJ murine osteosarcoma viral oncogene homolog                                                                                                                          | 2.49 |
| 208891_at    | DUSP6: dual specificity phosphatase 6                                                                                                                                              | 2.48 |
| 243528_at    | ---: Transcribed locus                                                                                                                                                             | 2.47 |
| 240574_at    | ---: CDNA clone IMAGE:5262677                                                                                                                                                      | 2.47 |
| 208893_s_at  | DUSP6: dual specificity phosphatase 6                                                                                                                                              | 2.45 |
| 220777_at    | KIF13A: kinesin family member 13A                                                                                                                                                  | 2.43 |
| 235052_at    | ZNF792: zinc finger protein 792                                                                                                                                                    | 2.40 |
| 212225_at    | EIF1: eukaryotic translation initiation factor 1                                                                                                                                   | 2.40 |
| 231985_at    | MICAL3: microtubule associated monooxygenase, calponin and LIM domain containing 3                                                                                                 | 2.39 |
| 236846_at    | LOC284757: hypothetical protein LOC284757                                                                                                                                          | 2.39 |
| 241471_at    | LOC730236: hypothetical LOC730236                                                                                                                                                  | 2.39 |
| 1559042_at   | NDUFB6: NADH dehydrogenase (ubiquinone) 1 beta subcomplex, 6, 17kDa                                                                                                                | 2.38 |
| 232504_at    | LOC285628: hypothetical protein LOC285628                                                                                                                                          | 2.38 |
| 229298_at    | KBTBD7: kelch repeat and BTB (POZ) domain containing 7                                                                                                                             | 2.37 |
| 235811_at    | ---: ---                                                                                                                                                                           | 2.37 |
| 239208_s_at  | C21orf57: Chromosome 21 open reading frame 57                                                                                                                                      | 2.36 |
| 214945_at    | FAM153A /// FAM153B /// FAM153C: family with sequence similarity 153, member B /// family with sequence similarity 153, member A /// family with sequence similarity 153, member C | 2.34 |
| 208792_s_at  | CLU: clusterin                                                                                                                                                                     | 2.33 |
| 226360_at    | ZNRF3: zinc and ring finger 3                                                                                                                                                      | 2.32 |
| 1557472_a_at | FLJ30838: hypothetical gene supported by AL832565                                                                                                                                  | 2.32 |
| 228372_at    | C10orf128: chromosome 10 open reading frame 128                                                                                                                                    | 2.32 |
| 239847_at    | ---: CDNA clone IMAGE:6186815                                                                                                                                                      | 2.31 |
| 213005_s_at  | KANK1: KN motif and ankyrin repeat domains 1                                                                                                                                       | 2.30 |
| 1563963_at   | ---: Transcribed locus                                                                                                                                                             | 2.30 |
| 232912_at    | GPR180: G protein-coupled receptor 180                                                                                                                                             | 2.30 |
| 240601_at    | ---: Transcribed locus                                                                                                                                                             | 2.29 |
| 224956_at    | NUFIP2: nuclear fragile X mental retardation protein interacting protein 2                                                                                                         | 2.29 |
| 237865_x_at  | ---: ---                                                                                                                                                                           | 2.29 |
| 227693_at    | WDR20: WD repeat domain 20                                                                                                                                                         | 2.29 |
| 238669_at    | PTGS1: prostaglandin-endoperoxide synthase 1 (prostaglandin G/H synthase and cyclooxygenase)                                                                                       | 2.29 |
| 243521_at    | ---: Transcribed locus                                                                                                                                                             | 2.28 |
| 212286_at    | ANKRD12: ankyrin repeat domain 12                                                                                                                                                  | 2.28 |
| 212327_at    | LIMCH1: LIM and calponin homology domains 1                                                                                                                                        | 2.27 |
| 240728_at    | PLCB4: Phospholipase C, beta 4                                                                                                                                                     | 2.25 |
| 212065_s_at  | USP34: ubiquitin specific peptidase 34                                                                                                                                             | 2.25 |
| 204310_s_at  | NPR2: natriuretic peptide receptor B/guanylate cyclase B (atriuretic peptide receptor B)                                                                                           | 2.24 |
| 213849_s_at  | PPP2R2B: protein phosphatase 2 (formerly 2A), regulatory subunit B, beta isoform                                                                                                   | 2.23 |
| 210218_s_at  | SP100: SP100 nuclear antigen                                                                                                                                                       | 2.22 |
| 231747_at    | CYSLTR1: cysteinyl leukotriene receptor 1                                                                                                                                          | 2.22 |
| 234605_at    | CDC14B: CDC14 cell division cycle 14 homolog B (S. cerevisiae)                                                                                                                     | 2.22 |
| 226298_at    | RUNDC1: RUN domain containing 1                                                                                                                                                    | 2.22 |
| 205128_x_at  | PTGS1: prostaglandin-endoperoxide synthase 1 (prostaglandin G/H synthase and cyclooxygenase)                                                                                       | 2.21 |
| 234986_at    | ---: Transcribed locus                                                                                                                                                             | 2.21 |
| 240154_at    | ---: Transcribed locus                                                                                                                                                             | 2.20 |
| 218534_s_at  | AGGF1: angiogenic factor with G patch and FHA domains 1                                                                                                                            | 2.20 |
| 236031_x_at  | ---: CDNA FLJ30128 fis, clone BRACE1000124                                                                                                                                         | 2.20 |
| 235532_at    | PIGM: phosphatidylinositol glycan anchor biosynthesis, class M                                                                                                                     | 2.20 |
| 235255_at    | ATP6V0A2: ATPase, H+ transporting, lysosomal V0 subunit a2                                                                                                                         | 2.19 |
| 204545_at    | PEX6: peroxisomal biogenesis factor 6                                                                                                                                              | 2.19 |
| 226782_at    | SLC25A30: solute carrier family 25, member 30                                                                                                                                      | 2.19 |
| 1563364_at   | ---: Homo sapiens, clone IMAGE:4272847, mRNA                                                                                                                                       | 2.19 |
| 242878_at    | ---: ---                                                                                                                                                                           | 2.18 |
| 241438_at    | ---: Transcribed locus                                                                                                                                                             | 2.18 |
| 213506_at    | F2RL1: coagulation factor II (thrombin) receptor-like 1                                                                                                                            | 2.18 |
| 215388_s_at  | CFH /// CFHR1: complement factor H /// complement factor H-related 1                                                                                                               | 2.17 |
| 215813_s_at  | PTGS1: prostaglandin-endoperoxide synthase 1 (prostaglandin G/H synthase and cyclooxygenase)                                                                                       | 2.17 |
| 204720_s_at  | DNAJC6: DnaJ (Hsp40) homolog, subfamily C, member 6                                                                                                                                | 2.17 |
| 1560697_at   | LOC283392: hypothetical protein LOC283392                                                                                                                                          | 2.16 |
| 226189_at    | ITGB8: integrin, beta 8                                                                                                                                                            | 2.16 |
| 227404_s_at  | EGR1: Early growth response 1                                                                                                                                                      | 2.15 |
| 219738_s_at  | PCDH9: protocadherin 9                                                                                                                                                             | 2.14 |
| 236160_at    | ---: Transcribed locus                                                                                                                                                             | 2.13 |

|              |                                                                                           |      |
|--------------|-------------------------------------------------------------------------------------------|------|
| 242579_at    | BMPR1B: bone morphogenetic protein receptor, type IB                                      | 2.13 |
| 219615_s_at  | KCNK5: potassium channel, subfamily K, member 5                                           | 2.13 |
| 210377_at    | ACSM3: acyl-CoA synthetase medium-chain family member 3                                   | 2.12 |
| 239449_at    | ---: Transcribed locus                                                                    | 2.12 |
| 226109_at    | C21orf91: chromosome 21 open reading frame 91                                             | 2.12 |
| 204071_s_at  | TOPORS: topoisomerase I binding, arginine/serine-rich                                     | 2.12 |
| 223263_s_at  | FGFR10P2: FGFR1 oncogene partner 2                                                        | 2.11 |
| 219737_s_at  | PCDH9: protocadherin 9                                                                    | 2.11 |
| 226483_at    | TMEM68: transmembrane protein 68                                                          | 2.10 |
| 220577_at    | GVIN1: GTPase, very large interferon inducible 1                                          | 2.09 |
| 218294_s_at  | NUP50: nucleoporin 50kDa                                                                  | 2.09 |
| 205942_s_at  | ACSM3: acyl-CoA synthetase medium-chain family member 3                                   | 2.09 |
| 221524_s_at  | RRAGD: Ras-related GTP binding D                                                          | 2.09 |
| 239901_at    | ---: Transcribed locus                                                                    | 2.08 |
| 240777_at    | SYNE2: Spectrin repeat containing, nuclear envelope 2                                     | 2.07 |
| 1554665_at   | ZNF586: zinc finger protein 586                                                           | 2.07 |
| 235342_at    | SPOCK3: sparc/osteonectin, cwcv and kazal-like domains proteoglycan (testican) 3          | 2.07 |
| 237590_at    | ---: ---                                                                                  | 2.06 |
| 238744_at    | ---: Transcribed locus                                                                    | 2.06 |
| 232150_at    | ---: CDNA clone IMAGE:4792085                                                             | 2.06 |
| 227506_at    | SLC16A9: solute carrier family 16, member 9 (monocarboxylic acid transporter 9)           | 2.06 |
| 220235_s_at  | C1orf103: chromosome 1 open reading frame 103                                             | 2.06 |
| 219504_s_at  | RPAP2: RNA polymerase II associated protein 2                                             | 2.05 |
| 205140_at    | FPGT: fucose-1-phosphate guanylyltransferase                                              | 2.05 |
| 241399_at    | FAM19A2: family with sequence similarity 19 (chemokine (C-C motif)-like), member A2       | 2.05 |
| 239466_at    | LOC344595: hypothetical LOC344595                                                         | 2.04 |
| 234326_at    | ---: CDNA: FLJ21248 fis, clone COL01235                                                   | 2.04 |
| 1554806_a_at | FBXO8: F-box protein 8                                                                    | 2.04 |
| 240247_at    | ---: ---                                                                                  | 2.03 |
| 203869_at    | USP46: ubiquitin specific peptidase 46                                                    | 2.02 |
| 1562648_at   | CCDC88A: Coiled-coil domain containing 88A                                                | 2.01 |
| 1562406_at   | ---: CDNA clone IMAGE:5278001                                                             | 2.01 |
| 217536_x_at  | ---: Transcribed locus                                                                    | 2.01 |
| 230411_at    | ---: CDNA FLJ41934 fis, clone PERIC2005111                                                | 2.01 |
| 209795_at    | CD69: CD69 molecule                                                                       | 2.01 |
| 206118_at    | STAT4: signal transducer and activator of transcription 4                                 | 2.00 |
| 1552735_at   | PCDHGA4: protocadherin gamma subfamily A, 4                                               | 1.99 |
| 238170_at    | ---: Transcribed locus                                                                    | 1.99 |
| 239429_at    | ---: Transcribed locus                                                                    | 1.98 |
| 220572_at    | DKFZp547G183: hypothetical protein DKFZp547G183                                           | 1.98 |
| 232301_at    | UBE3B: ubiquitin protein ligase E3B                                                       | 1.98 |
| 214713_at    | YLPM1: YLP motif containing 1                                                             | 1.98 |
| 204739_at    | CENPC1: centromere protein C 1                                                            | 1.97 |
| 235264_at    | HCFC2: host cell factor C2                                                                | 1.97 |
| 235044_at    | CYYR1: cysteine/tyrosine-rich 1                                                           | 1.96 |
| 222156_x_at  | CCPG1: cell cycle progression 1                                                           | 1.96 |
| 230881_at    | CCDC42: coiled-coil domain containing 42                                                  | 1.96 |
| 204700_x_at  | C1orf107: chromosome 1 open reading frame 107                                             | 1.95 |
| 243331_at    | ---: Transcribed locus                                                                    | 1.95 |
| 209006_s_at  | C1orf63: chromosome 1 open reading frame 63                                               | 1.95 |
| 218614_at    | C12orf35: chromosome 12 open reading frame 35                                             | 1.94 |
| 205159_at    | CSF2RB: colony stimulating factor 2 receptor, beta, low-affinity (granulocyte-macrophage) | 1.94 |
| 226998_at    | NARG1: NMDA receptor regulated 1                                                          | 1.94 |
| 212979_s_at  | FAM115A: family with sequence similarity 115, member A                                    | 1.94 |
| 209757_s_at  | MYCN: v-myc myelocytomatosis viral related oncogene, neuroblastoma derived (avian)        | 1.93 |
| 243319_at    | ---: Transcribed locus                                                                    | 1.93 |
| 206861_s_at  | CGGBP1: CGG triplet repeat binding protein 1                                              | 1.92 |
| 218929_at    | CDKN2AIP: CDKN2A interacting protein                                                      | 1.91 |
| 238609_at    | C7orf38: chromosome 7 open reading frame 38                                               | 1.91 |
| 1569345_at   | ---: Transcribed locus                                                                    | 1.91 |
| 218472_s_at  | PELO: pelota homolog (Drosophila)                                                         | 1.90 |
| 227980_at    | ZNF322A: zinc finger protein 322A                                                         | 1.90 |
| 234081_at    | ---: CDNA FLJ11986 fis, clone HEMBB1001364                                                | 1.88 |

|              |                                                                                               |      |
|--------------|-----------------------------------------------------------------------------------------------|------|
| 1559485_at   | ATG2B: ATG2 autophagy related 2 homolog B ( <i>S. cerevisiae</i> )                            | 1.88 |
| 235014_at    | LOC147727: hypothetical LOC147727                                                             | 1.88 |
| 206109_at    | FUT1: fucosyltransferase 1 (galactoside 2-alpha-L-fucosyltransferase, H blood group)          | 1.88 |
| 242565_x_at  | C21orf57: Chromosome 21 open reading frame 57                                                 | 1.88 |
| 209585_s_at  | MINPP1: multiple inositol polyphosphate histidine phosphatase, 1                              | 1.87 |
| 201143_s_at  | EIF2S1: eukaryotic translation initiation factor 2, subunit 1 alpha, 35kDa                    | 1.87 |
| 218604_at    | LEMD3: LEM domain containing 3                                                                | 1.85 |
| 1564175_at   | LOC401074: Hypothetical LOC401074                                                             | 1.85 |
| 218520_at    | TBK1: TANK-binding kinase 1                                                                   | 1.85 |
| 226956_at    | MTMR3: myotubularin related protein 3                                                         | 1.84 |
| 234597_at    | ---: CDNA: FLJ20914 fis, clone ADSE00646                                                      | 1.84 |
| 223215_s_at  | C14orf100: chromosome 14 open reading frame 100                                               | 1.84 |
| 225236_at    | RBM18: RNA binding motif protein 18                                                           | 1.82 |
| 207128_s_at  | ZNF223: zinc finger protein 223                                                               | 1.81 |
| 227559_at    | ---: Transcribed locus                                                                        | 1.81 |
| 229373_at    | ---: Transcribed locus                                                                        | 1.79 |
| 238725_at    | ---: Transcribed locus                                                                        | 1.79 |
| 227410_at    | FAM43A: family with sequence similarity 43, member A                                          | 1.79 |
| 241116_at    | ---: Transcribed locus                                                                        | 1.79 |
| 1560274_at   | LOC100132279 /// WTAP: Wilms tumor 1 associated protein /// hypothetical protein LOC100132279 | 1.79 |
| 1555486_a_at | FLJ14213: protor-2                                                                            | 1.79 |
| 1554501_at   | TSC22D4: TSC22 domain family, member 4                                                        | 1.79 |
| 239081_at    | ---: Transcribed locus                                                                        | 1.78 |
| 201694_s_at  | EGR1: early growth response 1                                                                 | 1.78 |
| 218535_s_at  | RIOK2: RIO kinase 2 (yeast)                                                                   | 1.77 |
| 204447_at    | ProSAPIP1: ProSAPIP1 protein                                                                  | 1.76 |
| 224628_at    | C2orf30: chromosome 2 open reading frame 30                                                   | 1.76 |
| 236360_at    | FLJ42875: hypothetical LOC440556                                                              | 1.76 |
| 206016_at    | CCDC22: coiled-coil domain containing 22                                                      | 1.76 |
| 215525_at    | ---: ---                                                                                      | 1.75 |
| 219383_at    | FLJ14213: protor-2                                                                            | 1.75 |
| 202097_at    | NUP153: nucleoporin 153kDa                                                                    | 1.75 |
| 228753_at    | LOC100128737: hypothetical protein LOC100128737                                               | 1.74 |
| 213109_at    | TNIK: TRAF2 and NCK interacting kinase                                                        | 1.74 |
| 238355_at    | RBM39: RNA binding motif protein 39                                                           | 1.74 |
| 222893_s_at  | RPAP2: RNA polymerase II associated protein 2                                                 | 1.73 |
| 219436_s_at  | EMCN: endomucin                                                                               | 1.73 |
| 213376_at    | ZBTB1: zinc finger and BTB domain containing 1                                                | 1.72 |
| 233226_at    | PTPN9: Protein tyrosine phosphatase, non-receptor type 9                                      | 1.71 |
| 203761_at    | SLA: Src-like-adaptor                                                                         | 1.71 |
| 225132_at    | FBXL3: F-box and leucine-rich repeat protein 3                                                | 1.71 |
| 226280_at    | ---: CDNA FLJ43545 fis, clone PROST2011631                                                    | 1.70 |
| 244613_at    | ---: ---                                                                                      | 1.69 |
| 209193_at    | PIM1: pim-1 oncogene                                                                          | 1.69 |
| 236128_at    | ZNF91: zinc finger protein 91                                                                 | 1.67 |
| 216465_at    | ---: MRNA; cDNA DKFZp586N2022 (from clone DKFZp586N2022)                                      | 1.67 |
| 223470_at    | PIGM: phosphatidylinositol glycan anchor biosynthesis, class M                                | 1.67 |
| 205928_at    | ZNF443: zinc finger protein 443                                                               | 1.66 |
| 221025_x_at  | PUS7L: pseudouridylate synthase 7 homolog ( <i>S. cerevisiae</i> )-like                       | 1.65 |
| 201236_s_at  | BTG2: BTG family, member 2                                                                    | 1.64 |
| 232265_at    | ATXN7L1: ataxin 7-like 1                                                                      | 1.64 |
| 225005_at    | PHF13: PHD finger protein 13                                                                  | 1.62 |
| 225445_at    | tcag7.1228: hypothetical protein FLJ25778                                                     | 1.61 |
| 222312_s_at  | ---: CDNA clone IMAGE:6186815                                                                 | 1.61 |
| 200881_s_at  | DNAJA1: DnaJ (Hsp40) homolog, subfamily A, member 1                                           | 1.61 |
| 213233_s_at  | KLHL9: kelch-like 9 ( <i>Drosophila</i> )                                                     | 1.60 |
| 241445_at    | ---: Transcribed locus                                                                        | 1.59 |
| 214651_s_at  | HOXA9: homeobox A9                                                                            | 1.57 |
| 227066_at    | MOBK12C: MOB1, Mps One Binder kinase activator-like 2C (yeast)                                | 1.56 |
| 230520_at    | AIG1: androgen-induced 1                                                                      | 1.56 |
| 238279_x_at  | ---: ---                                                                                      | 1.55 |
| 1569098_s_at | TP53BP1: tumor protein p53 binding protein 1                                                  | 1.55 |
| 225490_at    | ARID2: AT rich interactive domain 2 (ARID, RFX-like)                                          | 1.54 |

|              |                                                                                                                                                                |        |
|--------------|----------------------------------------------------------------------------------------------------------------------------------------------------------------|--------|
| 223377_x_at  | CISH: cytokine inducible SH2-containing protein                                                                                                                | 1.54   |
| 242761_s_at  | ZNF420: zinc finger protein 420                                                                                                                                | 1.52   |
| 201041_s_at  | DUSP1: dual specificity phosphatase 1                                                                                                                          | 1.51   |
| 228445_at    | AIFM2: apoptosis-inducing factor, mitochondrion-associated, 2                                                                                                  | 1.50   |
| 218079_s_at  | GGNBP2: gametogenetin binding protein 2                                                                                                                        | 1.50   |
| 226504_at    | FAM109B: family with sequence similarity 109, member B                                                                                                         | 1.48   |
| 225121_at    | TBC1D23: TBC1 domain family, member 23                                                                                                                         | 1.48   |
| 225912_at    | TP53INP1: tumor protein p53 inducible nuclear protein 1                                                                                                        | -1.70  |
| 226419_s_at  | FLJ44342: hypothetical LOC645460                                                                                                                               | -1.73  |
| 206674_at    | FLT3: fms-related tyrosine kinase 3                                                                                                                            | -1.76  |
| 224606_at    | KLF6: Kruppel-like factor 6                                                                                                                                    | -1.78  |
| 241353_s_at  | LOC100129105: similar to hCG1821214                                                                                                                            | -1.86  |
| 225673_at    | MYADM: myeloid-associated differentiation marker                                                                                                               | -1.93  |
| 204639_at    | ADA: adenosine deaminase                                                                                                                                       | -1.98  |
| 208763_s_at  | TSC22D3: TSC22 domain family, member 3                                                                                                                         | -2.03  |
| 244080_at    | ---: Transcribed locus, strongly similar to XP_001151823.1 PREDICTED: hypothetical protein [Pan troglodytes]                                                   | -2.04  |
| 36829_at     | PER1: period homolog 1 (Drosophila)                                                                                                                            | -2.07  |
| 214176_s_at  | ---: Transcribed locus                                                                                                                                         | -2.11  |
| 226525_at    | ---: Transcribed locus                                                                                                                                         | -2.17  |
| 215671_at    | PDE4B: phosphodiesterase 4B, cAMP-specific (phosphodiesterase E4 dunce homolog, Drosophila)                                                                    | -2.34  |
| 230986_at    | KLF8: Kruppel-like factor 8                                                                                                                                    | -2.36  |
| 213665_at    | SOX4: SRY (sex determining region Y)-box 4                                                                                                                     | -2.39  |
| 236253_at    | ---: Transcribed locus                                                                                                                                         | -2.49  |
| 229178_at    | LOC145786: hypothetical protein LOC145786                                                                                                                      | -2.56  |
| 223708_at    | C1QTNF4: C1q and tumor necrosis factor related protein 4                                                                                                       | -2.64  |
| 228983_at    | ---: Transcribed locus                                                                                                                                         | -2.78  |
| 231508_s_at  | ---: Transcribed locus                                                                                                                                         | -2.79  |
| 214043_at    | PTPRD: protein tyrosine phosphatase, receptor type, D                                                                                                          | -2.80  |
| 201324_at    | EMP1: epithelial membrane protein 1                                                                                                                            | -2.81  |
| 207735_at    | RNF125: ring finger protein 125                                                                                                                                | -2.82  |
| 1552803_a_at | C1orf215: chromosome 1 open reading frame 215                                                                                                                  | -2.82  |
| 202861_at    | PER1: period homolog 1 (Drosophila)                                                                                                                            | -2.96  |
| 222044_at    | PCIF1: PDX1 C-terminal inhibiting factor 1                                                                                                                     | -2.96  |
| 204784_s_at  | MLF1: myeloid leukemia factor 1                                                                                                                                | -3.03  |
| 228188_at    | FOSL2: FOS-like antigen 2                                                                                                                                      | -3.15  |
| 230233_at    | ---: Transcribed locus                                                                                                                                         | -3.21  |
| 242051_at    | ---: Transcribed locus                                                                                                                                         | -3.22  |
| 239476_at    | ---: CDNA FLJ36491 fis, clone THYMU2018197                                                                                                                     | -3.26  |
| 1561079_at   | ANKRD28: ankyrin repeat domain 28                                                                                                                              | -3.29  |
| 206726_at    | PGDS: prostaglandin D2 synthase, hematopoietic                                                                                                                 | -3.50  |
| 203708_at    | PDE4B: phosphodiesterase 4B, cAMP-specific (phosphodiesterase E4 dunce homolog, Drosophila)                                                                    | -3.79  |
| 239809_at    | ---: Transcribed locus                                                                                                                                         | -4.17  |
| 205239_at    | AREG /// LOC727738: amphiregulin (schwannoma-derived growth factor) /// similar to Amphiregulin precursor (AR) (Colorectum cell-derived growth factor) (CRDGF) | -7.56  |
| 215446_s_at  | LOX: lysyl oxidase                                                                                                                                             | -10.59 |

**Supplementary Table 2.** Selected list of genes that have been implicated in hematopoietic malignancies and are differentially expressed between elderly and young human HSC; age-up-regulated genes are in red, and age-down-regulated genes are in green.

| Gene ID     | Gene Name                                                              | Fold Change |
|-------------|------------------------------------------------------------------------|-------------|
| 208079_s_at | AURKA: aurora kinase A                                                 | 1.81        |
| 209189_at   | FOS: v-fos FBJ murine osteosarcoma viral oncogene homolog              | 2.49        |
| 209905_at   | HOXA9: homeobox A9                                                     | 1.62        |
| 202431_s_at | MYC: v-myc myelocytomatosis viral oncogene homolog (avian)             | 2.65        |
| 230192_at   | TRIM13: tripartite motif-containing 13                                 | 2.91        |
| 36711_at    | MAFF: v-maf musculoaponeurotic fibrosarcoma oncogene homolog F (avian) | -2.06       |
| 206674_at   | FLT3: fms-related tyrosine kinase 3                                    | -1.76       |

**Supplementary Table 3.** Complete blood count (CBC) values from matching peripheral blood of bone marrow samples used for this study (data available for subset of samples only).

|     |        | Complete Blood Count |      |      |     |       |      |      |
|-----|--------|----------------------|------|------|-----|-------|------|------|
| Age | Gender | WBC                  | Hb   | HCT  | PLT | MCV   | RDW  | RBC  |
| 24  | Male   | 5.3                  | 14.1 | 39.8 | 225 | 87.2  | 13.1 | 4.57 |
| 24  | Female | 8.5                  | 13.1 | 37.6 | 269 | 93.7  | 12.5 | 4.01 |
| 26  | Female | 4.5                  | 14   | 14.3 | 198 | 94.6  | 13.7 | 4.36 |
| 26  | Male   | 4.3                  | 14.4 | 41.8 | 200 | 89.5  | 13.5 | 4.67 |
| 27  | Female | 7.3                  | 15.9 | 45.4 | 224 | 87.7  | 12.9 | 5.18 |
| 30  | Female | 6.3                  | 13.1 | 37.8 | 191 | 89.3  | 13.6 | 4.23 |
| 31  | Male   | 8.1                  | 14.4 | 40.8 | 274 | 93.8  | 14.4 | 4.35 |
| 65  | Male   | 5.2                  | 14.6 | 43   | 195 | 91    | 13.9 | 4.72 |
| 65  | Male   | 4.7                  | 15.1 | 43.6 | 184 | 91    | 14.1 | 4.78 |
| 68  | Male   | 7                    | 14.8 | 42.8 | 236 | 92    | 13.1 | 4.68 |
| 68  | Male   | 8.1                  | 13.2 | 38.4 | 230 | 98    | 12.1 | 3.92 |
| 73  | Male   | 5.6                  | 13.4 | 38.4 | 295 | 87    | 13.1 | 4.41 |
| 75  | Male   | 7.3                  | 15.1 | 44   | 219 | 89.5  | 13.8 | 4.91 |
| 81  | Male   | 9.4                  | 15.4 | 44.9 | 188 | 89.5  | 14.7 | 5.02 |
| 83  | Female | 7.1                  | 13.3 | 39.4 | 250 | 89.9  | 14.1 | 4.38 |
| 85  | Female | 5.1                  | 12.7 | 37   | 215 | 100.5 | 13.7 | 3.68 |
| 85  | Female | 6.2                  | 13.8 | 41.1 | 163 | 87.4  | 15.3 | 4.7  |

**Supplementary Figure 1. Increased frequency of HSC out of total mononuclear cells isolated from normal elderly bone marrow compared to young.**

(A) Summary of HSC as frequency of total bone marrow mononuclear cell population from multiple young (n=13) and elderly (n=11) bone marrow samples. \* =  $p < 0.002$ . (B) CD34+ cells as frequency of total bone marrow mononuclear cell population from multiple young (n=13) and elderly (n=11) bone marrow samples. (C) Relative HSC as frequency of total bone marrow mononuclear cell population from multiple young (n=13) and elderly (n=11) bone marrow samples, adjusted for bone marrow cellularity, as estimated from bone marrow core biopsies. # =  $p < 0.02$ . Error bars represent standard deviation.



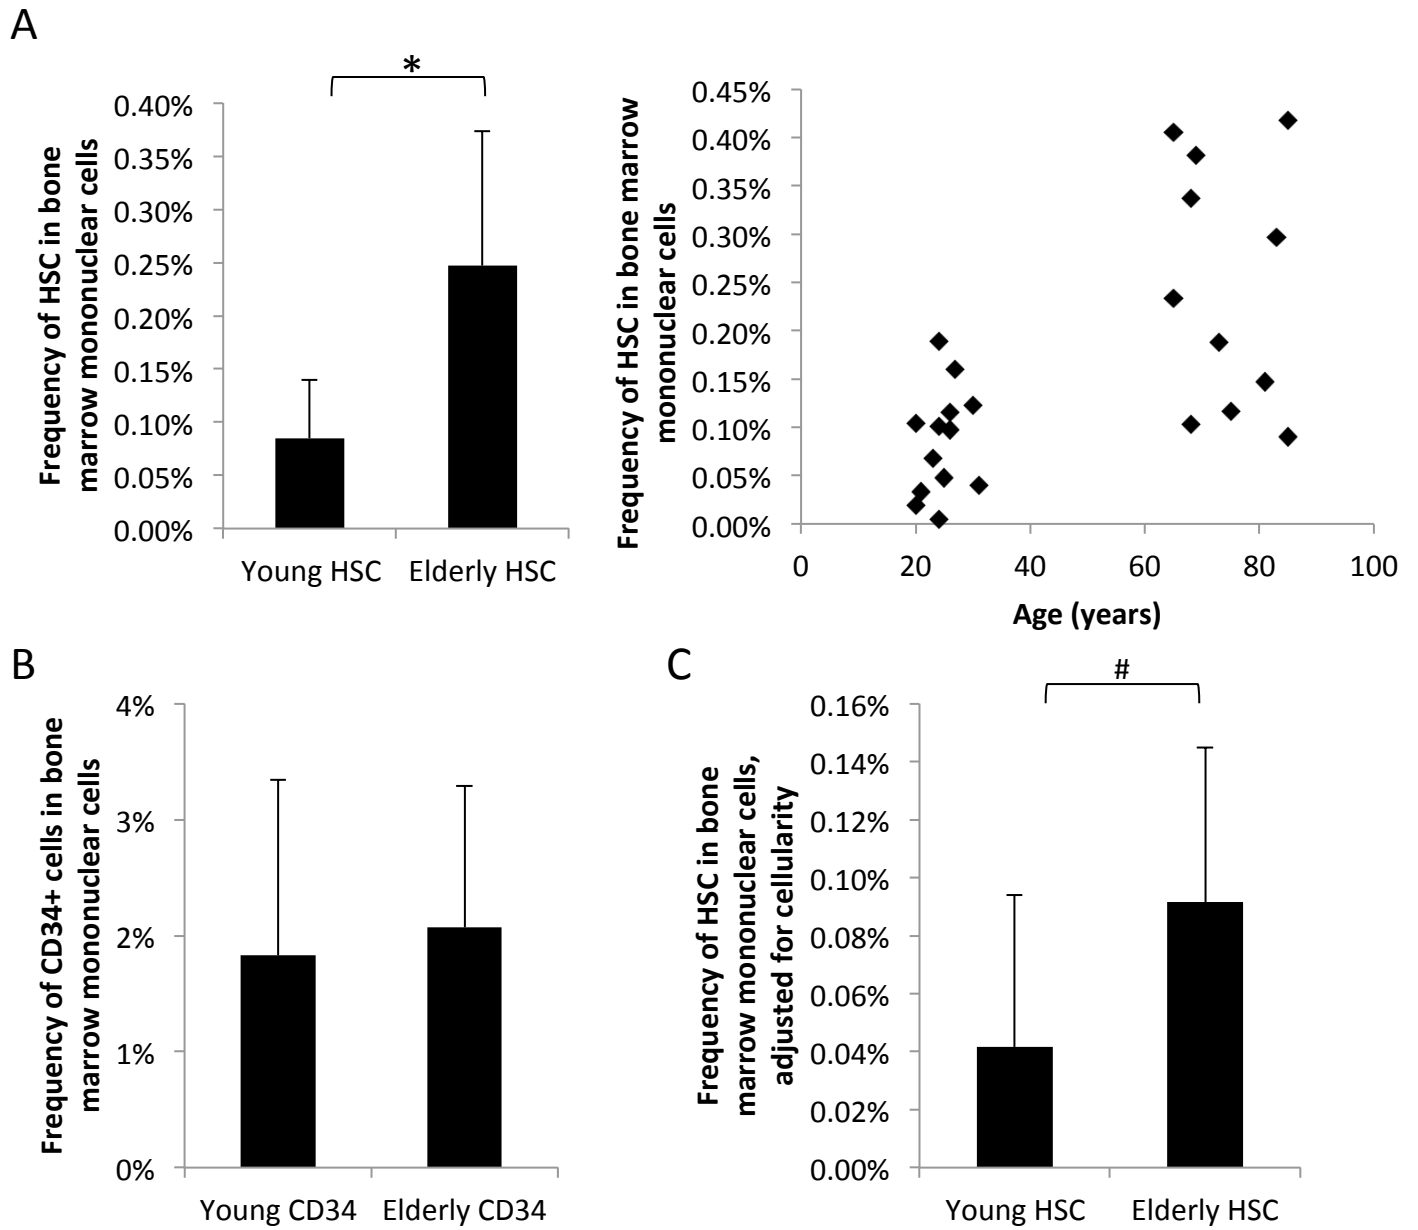

Supplementary Figure 1

**Supplementary Figure 2. Frequency of MPP in normal elderly bone marrow compared to young.**

(A) Gating strategy and flow cytometric profile of MPP ( $\text{Lin}^-$ ,  $\text{CD34}^+$ ,  $\text{CD38}^-$ ,  $\text{CD90}^-$ ,  $\text{CD45RA}^-$ ) in representative hematopoietically normal young (left) and elderly (right) bone marrow samples. The panels for each sample are gated on  $\text{Lin}^- \text{CD34}^+ \text{CD38}^-$  live cells. (B) Summary of MPP as frequency of total  $\text{Lin}^- \text{CD34}^+$  population from multiple young (n=13) and elderly (n=11) bone marrow samples. (C) Summary of MPP as frequency of total bone marrow mononuclear cell population from multiple young (n=13) and elderly (n=11) bone marrow samples. Error bars represent standard deviation.

**A** Young Bone Marrow (31 year old, male):  
Live, Lin-CD34+CD38-:

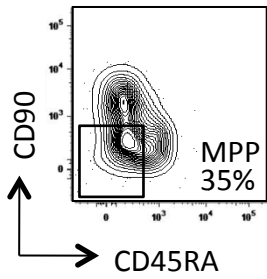

Elderly Bone Marrow (83 year old, female):  
Live, Lin-CD34+CD38-:

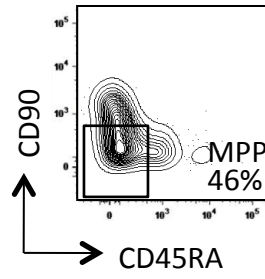

**B**

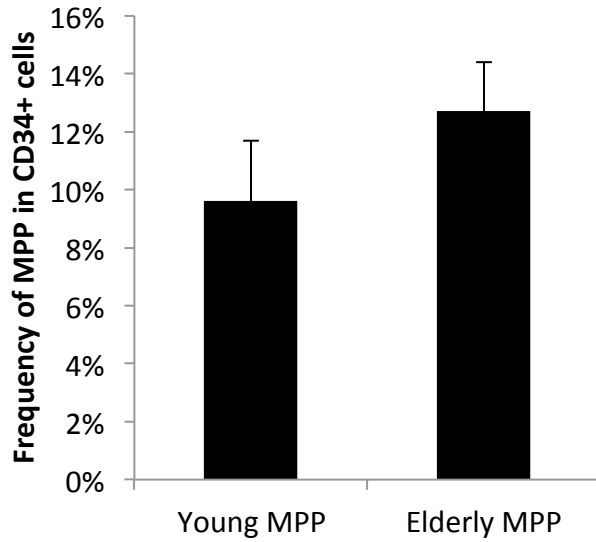

**C**

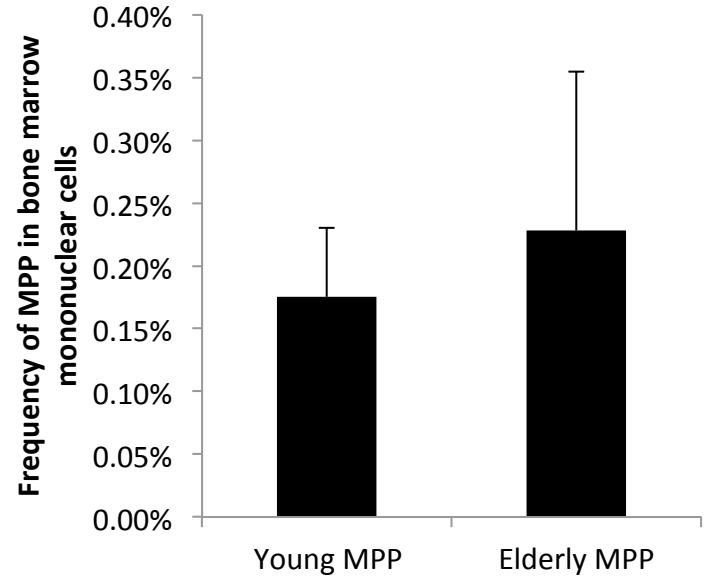

**Supplementary Figure 3. Gating strategy and cell cycle flow cytometric profile of live, Lin<sup>-</sup> CD34<sup>+</sup> cells.**

(A) Gating strategy and flow cytometric profile of quiescent G<sub>0</sub> (Hoechst 33342<sup>low</sup>, Pyronin Y<sup>low</sup>, correlating with 2N DNA and low levels of RNA) and non-G<sub>0</sub> (Pyronin Y<sup>high</sup>, correlating with 2N to 4N DNA and higher levels of RNA) populations in representative elderly and young HSC from hematopoietically normal bone marrow samples. The panels for each sample are gated on Lin-CD34+CD38-CD90+CD45RA- live cells. (B) Quiescent G<sub>0</sub> (Hoechst 33342<sup>low</sup>, Pyronin Y<sup>low</sup>, correlating with 2N DNA and low levels of RNA) and non-G<sub>0</sub> (Pyronin Y<sup>high</sup>, correlating with 2N to 4N DNA and higher levels of RNA) populations in representative elderly and young Lin<sup>-</sup> CD34<sup>+</sup> population from hematopoietically normal bone marrow samples. The panel is gated on Lin-CD34+CD38-CD90+CD45RA- live cells. This profile was used to set gates for Hoechst 33342 and Pyronin Y in (A).

**A** Young Bone Marrow (31 year old, male):  
Live, Lin-CD34+CD38-CD90+:

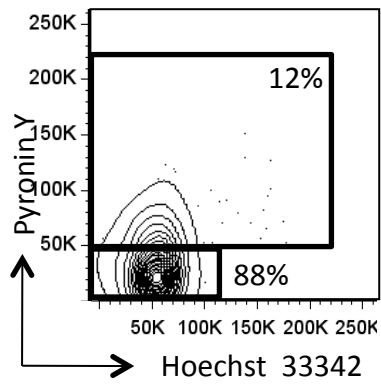

Elderly Bone Marrow (83 year old, female):  
Live, Lin-CD34+CD38-CD90+:

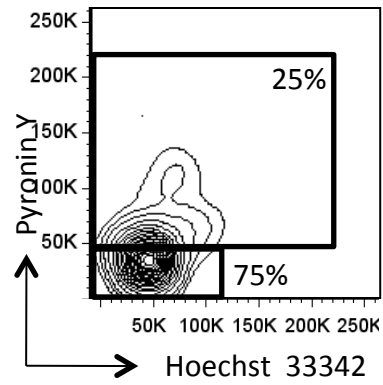

**B** Live, Lin-CD34+:

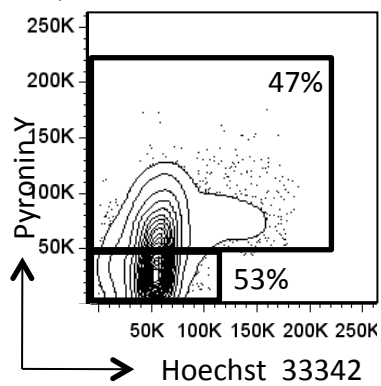

**Supplementary Figure 4. Similar myeloid progenitor frequencies in normal elderly and young bone marrow.**

(A) Gating strategy and flow cytometric profile of CMP ( $\text{Lin}^- \text{CD34}^+ \text{CD38}^+ \text{CD123}^+ \text{CD45RA}^-$ ), GMP ( $\text{Lin}^- \text{CD34}^+ \text{CD38}^+ \text{CD123}^+ \text{CD45RA}^+$ ), and MEP ( $\text{Lin}^- \text{CD34}^+ \text{CD38}^+ \text{CD123}^- \text{CD45RA}^-$ ) in representative hematopoietically normal young and elderly bone marrow samples. The left panels for each sample are gated on lineage negative ( $\text{Lin}^-$ ) live cells, and the right panels are gated on  $\text{Lin}^- \text{CD34}^+ \text{CD38}^+$  live cells. (B) Summary of myeloid progenitor (CMP, GMP, and MEP) frequencies as total of  $\text{Lin}^- \text{CD34}^+$  population from multiple young ( $n=13$ ) and elderly ( $n=11$ ) bone marrow samples. (C) Summary of myeloid progenitor (CMP, GMP, and MEP) frequencies as total of bone marrow mononuclear cell population from multiple young ( $n=13$ ) and elderly ( $n=11$ ) bone marrow samples. Error bars represent standard deviation.

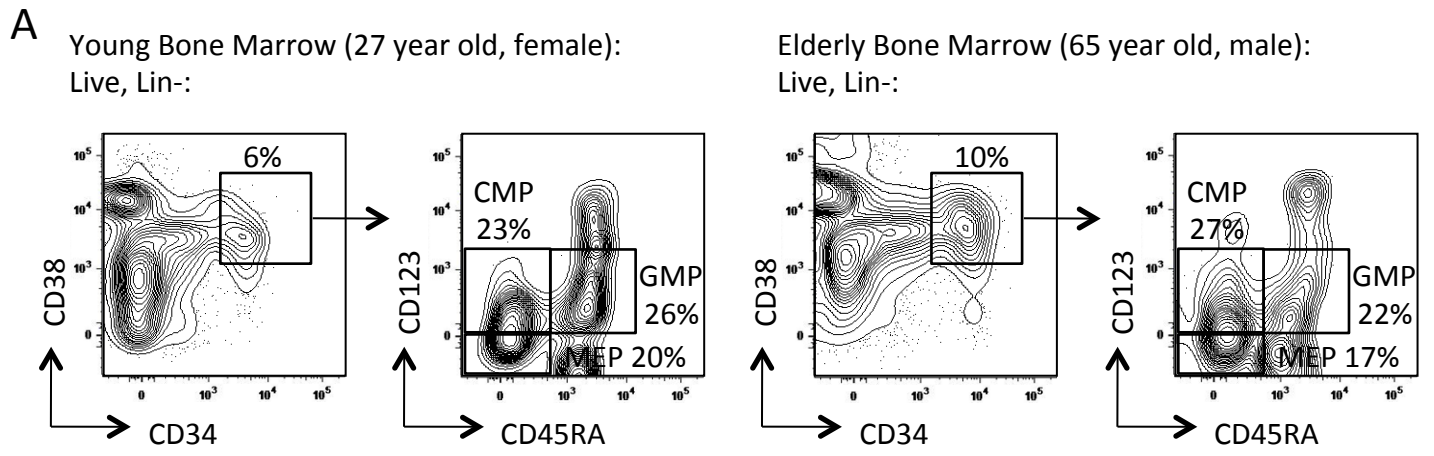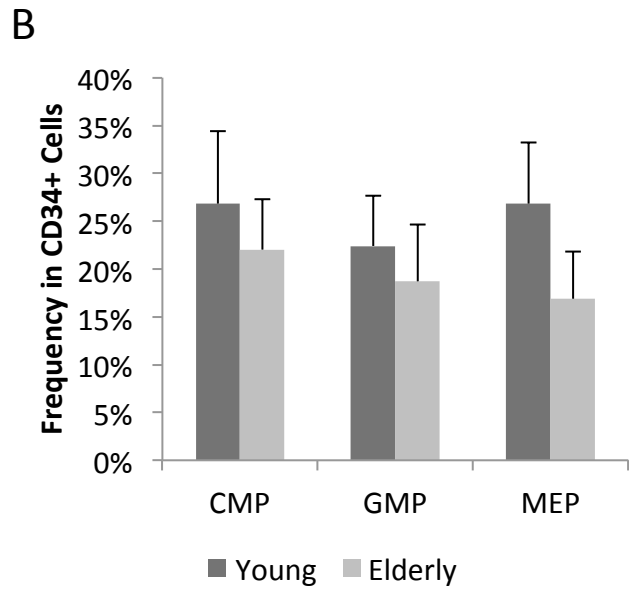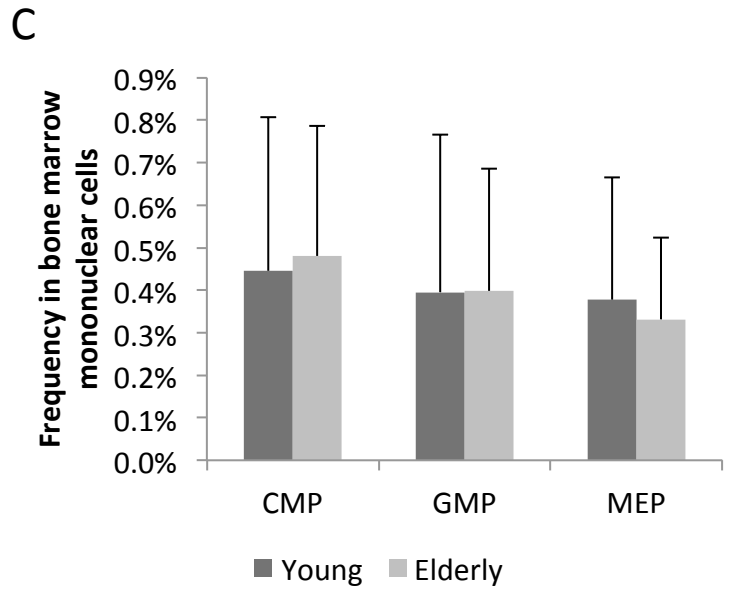

**Supplementary Figure 5. Decreased frequency of CLP out of total mononuclear cells isolated from normal elderly bone marrow compared to young.**

Summary of CLP as frequency of total bone marrow mononuclear cell population from multiple young (n=10) and elderly (n=7) bone marrow samples. # =  $p < 0.05$ . Error bars represent standard deviation.



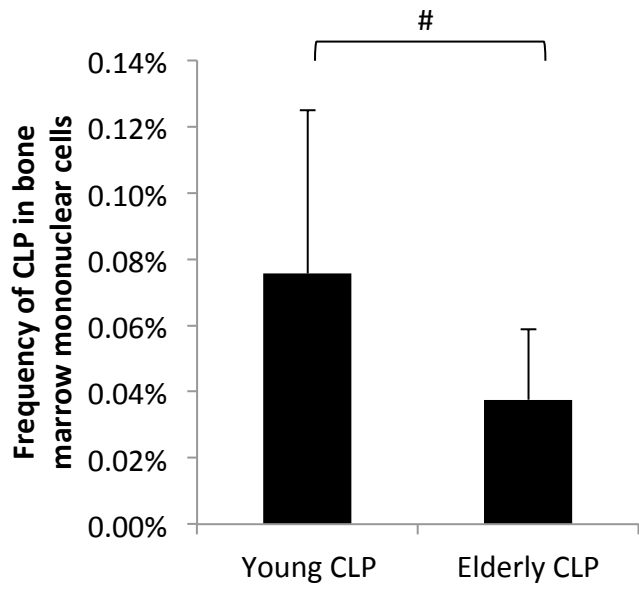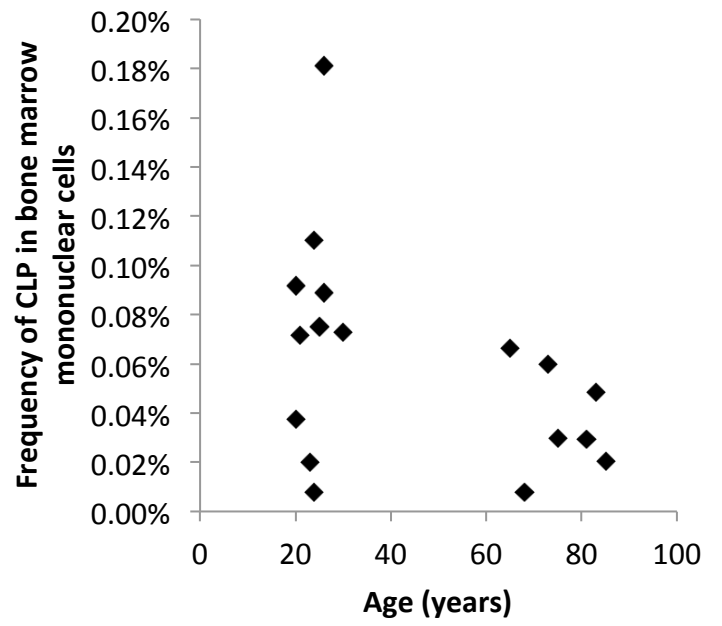

**Supplementary Figure 6. Generation of lymphoid and myeloid progeny *in vitro* by HSC from normal young and elderly bone marrow.**

(A) Summary of numbers and types of cells produced per 50 HSC from multiple normal young (n=8) and elderly (n=6) bone marrow samples co-cultured with AC6.2.1 stromal cell line. (B) Summary of numbers and types of colonies produced by 300 HSC from multiple normal young (n=6) and elderly (n=6) bone marrow samples cultured in methylcellulose medium. Error bars represent standard deviation.

A

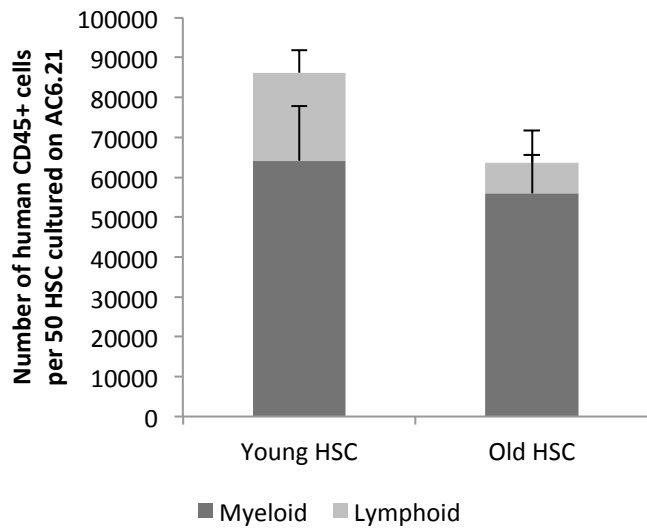

B

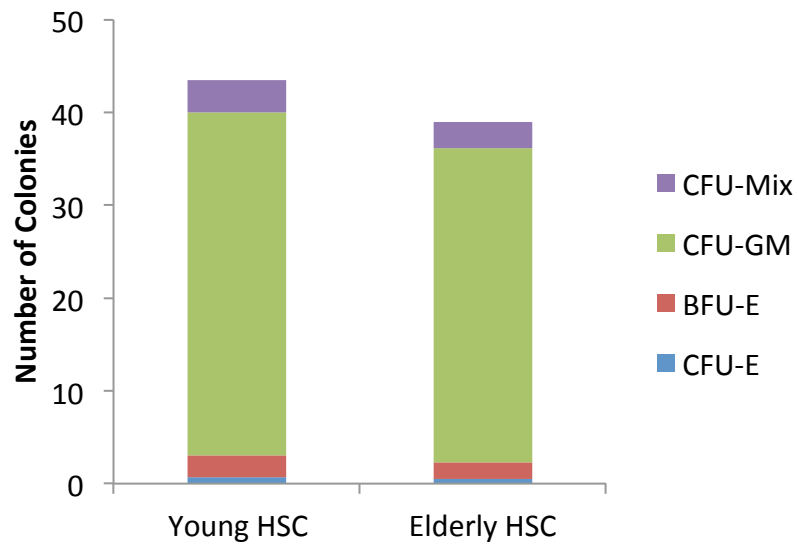

**Supplementary Figure 7. Engraftment of human T cells, erythroid cells, and platelets**

(A) Summary of spleen engraftment of human CD45<sup>+</sup>CD3<sup>+</sup> T cells as measured by percent human chimerism per 500 transplanted HSC from unique young (n=10) and elderly (n=9) bone marrow samples. (B) Summary of bone marrow engraftment of human glycophorin A<sup>+</sup> erythroid cells. (C) Summary of bone marrow engraftment of human CD41/61<sup>+</sup> platelets. Error bars represent standard deviation.

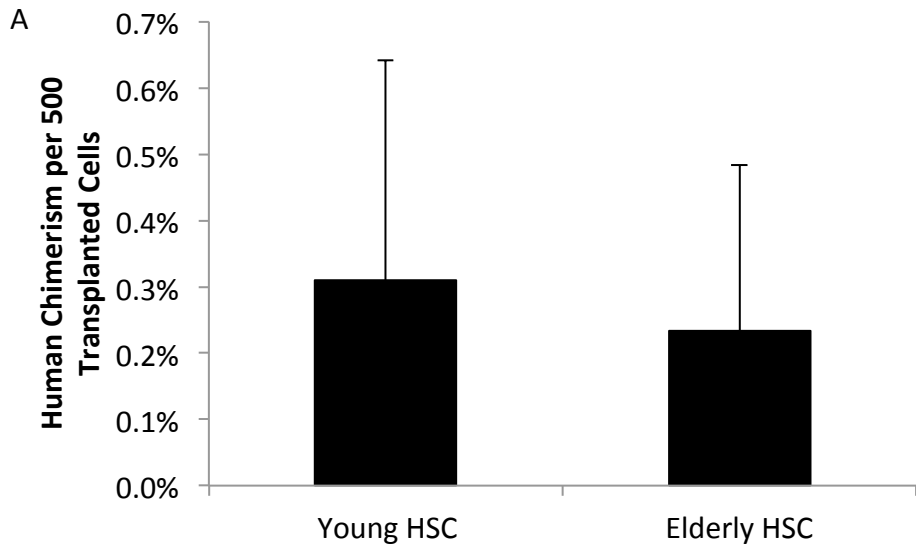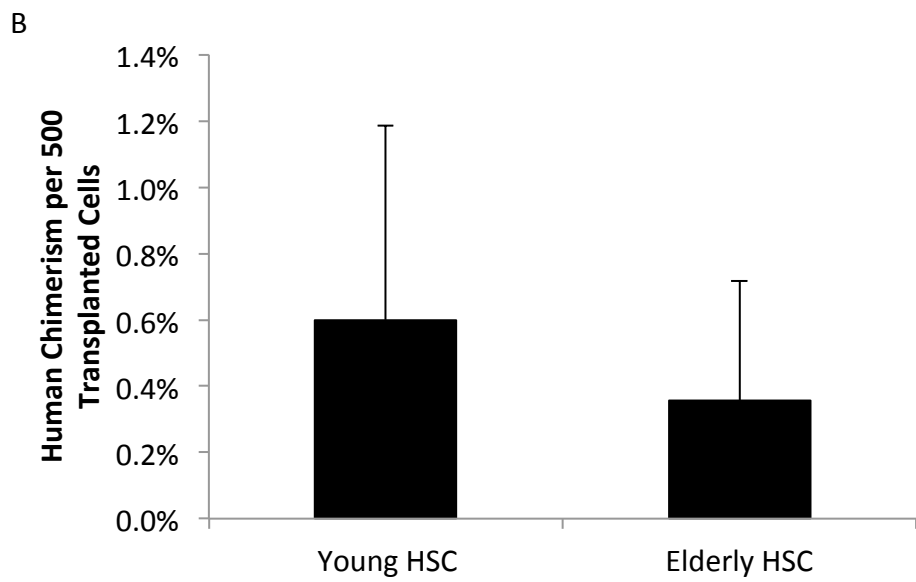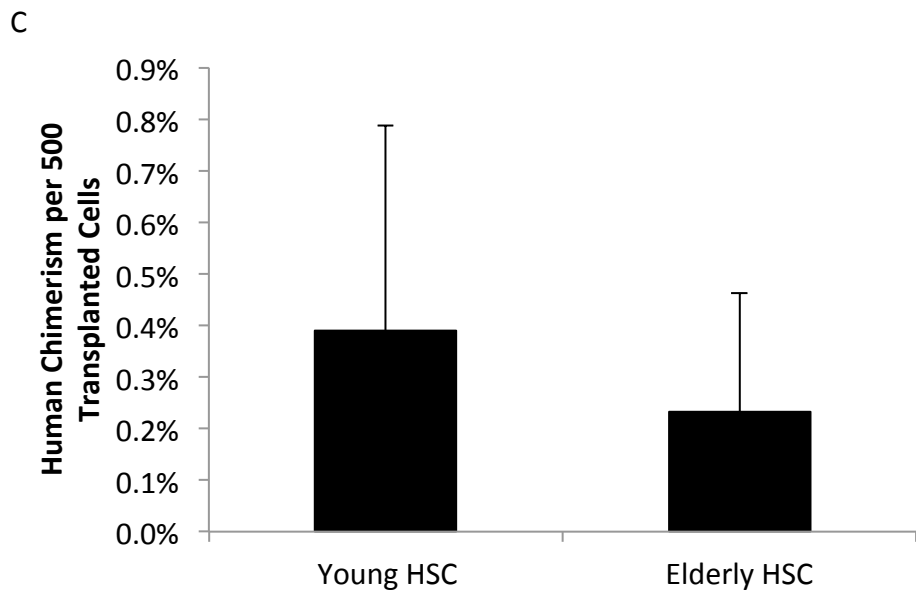

**Supplementary Figure 8. Purification of HSC from bone marrow by FACS**

(A) Representative flow cytometric profile of HSC prior to sorting. (B) Representative flow cytometric profile of sorted HSC which were re-analyzed to assess purity. (C) Summary of sort purity of sorted HSC from multiple young (n=11) and elderly (n=8) bone marrow samples.

A Pre-sort:  
Live, Lin<sup>-</sup>, CD34<sup>+</sup>, CD38<sup>-</sup>:

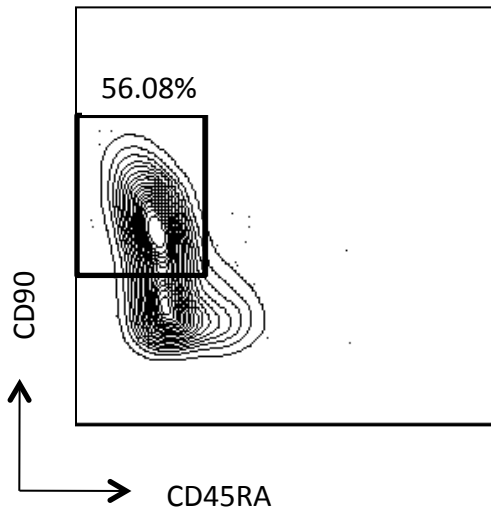

B Post-sort:  
Live:

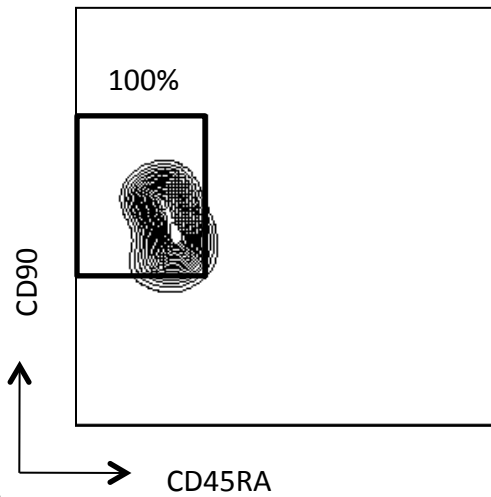

C

| Samples                 | Post-sort purity (range) |
|-------------------------|--------------------------|
| Elderly HSC (8 samples) | 96.55%-100.00%           |
| Young HSC (11 samples)  | 95.25%-100.00%           |

**Supplementary Figure 9. Ingenuity Pathways Analysis of age-regulated genes.**

(A) The “Cell Cycle, Connective Tissue Development and Function, Cellular Development” network and (B) the “Gene Expression, Hematological System Development and Function, Tissue Morphology” network are identified by IPA, based on the age-regulated genes from SAM, as the most significantly affected during human HSC aging. Selection of (B) biological functions and (C) molecular pathways identified by IPA as significantly enriched in the age-regulated HSC geneset.
